# Supplementary material for: Synthesis and self-assembly of a fluorine-containing amphiphilic graft copolymer bearing a perfluorocyclobutyl aryl ether-based backbone and poly(acrylic acid) side chains
Source: Royal Society of Chemistry journal article supplement (doi:10.1039/c5py00452g), 2015-01-01
Supplement: c5py00452g1.pdf [file c5py00452g1.pdf]

## Supporting Information for

### “Synthesis and Self-Assembly of Fluorine-Containing Amphiphilic Graft Copolymer Bearing Perfluorocyclobutyl Aryl Ether-Based Backbone and Poly(acrylic acid) Side Chains”

Hao Liu,<sup>1</sup> Sen Zhang,<sup>1</sup> Chun Feng,<sup>1,\*</sup> Yongjun Li,<sup>1,2</sup> Guolin Lu,<sup>1</sup> Xiaoyu Huang<sup>1,\*</sup>

<sup>1</sup> Key Laboratory of Synthetic and Self-Assembly Chemistry for Organic Functional Molecules and Key Laboratory of Organofluorine Chemistry, Shanghai Institute of Organic Chemistry, Chinese Academy of Sciences, 345 Lingling Road, Shanghai 200032, People's Republic of China

<sup>2</sup> State Key Laboratory of Molecular Engineering of Polymers, Department of Macromolecular Science, Fudan University, 220 Handan Road, Shanghai 200433, People's Republic of China

## Experimental Section

### Materials

*tert*-Butyl acrylate (*t*BA, Aldrich, 98%) was washed with 5% aqueous NaOH solution to remove the inhibitor, then washed with water, dried over CaCl<sub>2</sub> and distilled twice from CaH<sub>2</sub> under reduced pressure prior to use. Copper (I) bromide (CuBr, Aldrich, 98%) was purified by stirring overnight over CH<sub>3</sub>CO<sub>2</sub>H at room temperature, followed by washing the solid with ethanol, diethyl ether, and acetone prior to drying at 40°C *in vacuo* for one day. Anisole (Aldrich, 99%) and diphenyl ether (Aldrich, 99%) were dried over CaH<sub>2</sub> and distilled under reduced pressure prior

to use. *N*-Bromosuccinimide (NBS, Aldrich, 99%) was recrystallized from water and dried *in vacuo* at 35°C for one day. Benzoyl peroxide (BPO, Alfa Aesar, 97%) was purified by dissolving in acetone and precipitating in water followed by drying *in vacuo* at room temperature for one day. *N*-Phenyl-1-naphthylamine (PNA, Alfa Aesar, 97%) was purified by recrystallization in ethanol three times. Tetrahydrofuran (THF, Aldrich, 99%), dichloromethane (CH<sub>2</sub>Cl<sub>2</sub>, Aldrich, 99.5%), and toluene (Aldrich, 99%) were dried over CaH<sub>2</sub> and distilled from sodium and benzophenone under N<sub>2</sub> prior to use. 2-Methyl-1,4-bis(trifluorovinyl)oxybenzene (MBTFVB) and 4-methoxytrifluorovinylbenzene were prepared according to previous report.<sup>1</sup> *N,N,N',N',N''*-pentamethyldiethylenetriamine (PMDETA, Aldrich, 99%), acetonitrile (CH<sub>3</sub>CN, Aldrich, 99.8%), trifluoroacetic acid (TFA, Aldrich, 99%), and carbon tetrachloride (CCl<sub>4</sub>, Aldrich, 99.5%) were used as received.

## Measurements

FT-IR spectra were recorded on a Nicolet AVATAR-360 FT-IR spectrophotometer with a resolution of 4 cm<sup>-1</sup>. All <sup>1</sup>H (500 MHz), <sup>13</sup>C (125 MHz), and <sup>19</sup>F (470 MHz) NMR analyses were performed on a Bruker Avance 500 spectrometer in CDCl<sub>3</sub>, acetone-*d*<sub>6</sub>, and DMSO-*d*<sub>6</sub>, tetramethylsilane (<sup>1</sup>H NMR) and CDCl<sub>3</sub> (<sup>13</sup>C NMR) were used as internal standards and CF<sub>3</sub>CO<sub>2</sub>H was used as external standard for <sup>19</sup>F NMR. The bromine content was determined by the titration with Hg(NO<sub>3</sub>)<sub>2</sub>. Relative molecular weights and molecular weight distributions were measured by conventional gel permeation chromatography (GPC) system equipped with a Waters 1515 Isocratic

HPLC pump, a Waters 2414 refractive index detector, and a set of Waters Styragel columns (HR3 (500-30,000), HR4 (5,000-600,000) and HR5 (50,000-4,000,000), 7.8×300 mm, particle size: 5  $\mu$ m). GPC measurements were carried out at 35°C using tetrahydrofuran (THF) as eluent with a flow rate of 1.0 mL/min. The system was calibrated with linear polystyrene standards. Thermogravimetry analysis (TGA) measurements were run on a TA Q500 system under N<sub>2</sub> purge with a heating rate of 10°C/min. Steady-state fluorescence spectra were measured at 20°C on a Hitachi F-2700 fluorescence spectrophotometer with the bandwidth of 5 nm for excitation and emission, the emission intensity at 418 nm was recorded to determine the critical micelle concentration (*cmc*), where the excitation wavelength ( $\lambda_{\text{ex}}$ ) was 340 nm. TEM images were obtained by a JEOL JEM-1230 instrument operated at 80 kV.

### Preparation of PMBTFVB Homopolymer

PMBTFVB **1** homopolymer was prepared via thermal step-growth cycloaddition polymerization of MBTFVB aryl TFVE monomer followed by end-capping with 4-methoxytrifluorovinyloxybenzene according to previous literatures.<sup>2,3</sup> GPC:  $M_n$  = 4,200 g/mol,  $M_w/M_n$  = 1.21. FT-IR:  $\nu$  (cm<sup>-1</sup>): 3053, 2933, 1599, 1498, 1315, 1267, 1203, 1120, 1009, 962, 925, 813, 743. <sup>1</sup>H NMR (CDCl<sub>3</sub>):  $\delta$  (ppm): 2.07, 2.26 (3H, CH<sub>3</sub>), 3.75 (3H, OCH<sub>3</sub>), 6.99, 7.09 (3H, phenyl). <sup>13</sup>C MNR (CDCl<sub>3</sub>):  $\delta$  (ppm): 16.1 (CH<sub>3</sub>), 55.4 (OCH<sub>3</sub>), 105.5, 109.4, 112.8 (4C, cyclobutyl), 116.5, 121.3, 131.2, 148.4 (3C, phenyl). <sup>19</sup>F NMR (CDCl<sub>3</sub>):  $\delta$  (ppm): -128.2 to -132.3 (6F, cyclobutyl-*F*<sub>6</sub>).

## Mono-Bromination of PMBTFVB

The pendant methyls of PMBTFVB **1** homopolymer were mono-brominated by NBS and BPO. In a typical procedure, PMBTFVB **1** ( $M_{n, \text{GPC}} = 4,200$  g/mol,  $M_w/M_n = 1.21$ , 1.00 g, 3.52 mmol -CH<sub>3</sub> group), NBS (0.187 g, 1.05 mmol), and BPO (0.171 g, 0.70 mmol) were first added to a 500 mL three-neck flask (flame-dried prior to use) fitted with a reflux condenser followed by deoxygenating under N<sub>2</sub>. Next, 200 mL of CCl<sub>4</sub> was charged via a gastight syringe and the solution was refluxed at 80°C for 24 h. After filtration, CCl<sub>4</sub> was rotary evaporated from the filtrate. The obtained solid was dissolved in ethyl acetate (250 mL) and the resulting solution was washed with distilled water (200 mL×2) followed by drying over MgSO<sub>4</sub>. The solution was concentrated and precipitated into methanol. After repeated purification by dissolving in THF and precipitating in methanol, 0.683 g of white powder, PMBTFVB-Br **2a** macroinitiator, was obtained after drying *in vacuo* overnight. GPC:  $M_n = 5,800$  g/mol,  $M_w/M_n = 1.19$ . EA: Br%: 6.71%. <sup>1</sup>H NMR (CDCl<sub>3</sub>):  $\delta$  (ppm): 1.97, 2.19 (3H, CH<sub>3</sub>), 3.67 (3H, OCH<sub>3</sub>), 4.16, 4.34 (2H, CH<sub>2</sub>Br), 6.88, 7.04, 7.15 (3H, phenyl). <sup>13</sup>C MNR (CDCl<sub>3</sub>):  $\delta$  (ppm): 15.3 (CH<sub>3</sub>), 24.5 (CH<sub>2</sub>Br), 54.5 (OCH<sub>3</sub>), 105.0, 107.9, 111.9 (4C, cyclobutyl), 116.7, 118.6, 120.7, 129.4, 148.0 (3C, phenyl). <sup>19</sup>F NMR (CDCl<sub>3</sub>):  $\delta$  (ppm): -127.2 to -132.8 (6F, cyclobutyl-F<sub>6</sub>).

## ATRP Graft Copolymerization of *t*BA

ATRP graft copolymerization of *t*BA was initiated by PMBTFVB-Br **2** macroinitiator using CuBr/PMDETA as catalytic system. In a typical procedure,

PMBTFVB-Br **2a** ( $M_{n, \text{GPC}} = 5,800$  g/mol,  $M_w/M_n = 1.19$ , Br% = 6.71%, 195 mg, 0.1636 mmol -CH<sub>2</sub>Br group) and CuBr (23.4 mg, 0.1636 mmol) were first added to a 10 mL Schlenk flask (flame-dried under vacuum prior to use) sealed with a rubber septum for degassing and kept under N<sub>2</sub>. Next, *t*BA (2.37 mL, 16.36 mmol), anisole (1.18 mL), and PMDETA (34.16  $\mu$ L, 0.1636 mmol) were introduced via a gastight syringe. The flask was degassed by three cycles of freezing-pumping-thawing and the mixture was stirred at room temperature for 20 min so that the mixture became homogeneous. The flask was immersed into an oil bath preset at 80°C to start the polymerization. The polymerization was terminated by putting the flask into liquid N<sub>2</sub> after 30 min. The reaction mixture was diluted by THF and passed through an Al<sub>2</sub>O<sub>3</sub> column to remove the residual copper catalyst. The solution was concentrated and precipitated into methanol/H<sub>2</sub>O (v:v = 1:1). After repeated purification by dissolving in THF and precipitating in methanol/H<sub>2</sub>O (v:v = 1:1), 165.0 mg of white powder, PMBTFVB-*g*-PtBA **3a** graft copolymer, was obtained after drying *in vacuo* overnight. GPC:  $M_n = 10,500$  g/mol,  $M_w/M_n = 1.32$ . FT-IR:  $\nu$  (cm<sup>-1</sup>): 2977, 2938, 1729 ( $\nu_{\text{C=O}}$ ), 1481, 1448, 1395, 1369, 1257, 1152, 965, 845, 809, 750. <sup>1</sup>H NMR (acetone-*d*<sub>6</sub>):  $\delta$  (ppm): 1.36 (9H, C(CH<sub>3</sub>)<sub>3</sub>), 1.71 (2H, CH<sub>2</sub>CHCO<sub>2</sub>), 2.18 (3H, C<sub>6</sub>H<sub>5</sub>CH<sub>3</sub> and 1H, CH<sub>2</sub>CHCO<sub>2</sub>), 3.66 (3H, OCH<sub>3</sub>), 6.92-7.26 (3H, phenyl). <sup>13</sup>C MNR (CDCl<sub>3</sub>):  $\delta$  (ppm): 15.3 (CH<sub>3</sub>), 27.5 (3C, CO<sub>2</sub>C(CH<sub>3</sub>)<sub>3</sub>), 35.8, 37.3 (CH<sub>2</sub>CHCO), 42.1 (CH<sub>2</sub>CHCO), 80.5 (CO<sub>2</sub>C(CH<sub>3</sub>)<sub>3</sub>), 105.0, 107.8, 111.7 (4C, cyclobutyl), 116.5, 118.7, 120.8, 129.3, 148.1 (3C, phenyl), 173.3 (CO<sub>2</sub>C(CH<sub>3</sub>)<sub>3</sub>). <sup>19</sup>F NMR (acetone-*d*<sub>6</sub>):  $\delta$  (ppm): -126.6 to -133.0 (6F, cyclobutyl-*F*<sub>6</sub>).

### Acidolysis of PMBTFVB-*g*-PtBA

In a typical procedure, PMBTFVB-*g*-PtBA **3a** ( $M_{n, GPC} = 10,500$  g/mol,  $M_w/M_n = 1.32$ , 165 mg),  $\text{CH}_2\text{Cl}_2$  (25 mL), and TFA (5.0 mL) were added to a 50 mL three-neck flask. The solution was stirred at 0°C for 1 h followed by stirring at room temperature for another 24 h. The solution was concentrated and precipitated into cold *n*-hexane. After filtration, 75.2 mg of white powder, PMBTFVB-*g*-PAA **4a**, was obtained after drying *in vacuo* overnight.  $^1\text{H}$  NMR ( $\text{DMSO-}d_6$ ):  $\delta$  (ppm): 1.49, 1.75 (2H,  $\text{CH}_2\text{CHCO}_2$ ), 2.19, 2.26 (3H,  $\text{C}_6\text{H}_5\text{CH}_3$  and 1H,  $\text{CH}_2\text{CHCO}_2$ ), 6.83-7.29 (3H, phenyl), 12.30 (1H,  $\text{COOH}$ ). FT-IR:  $\nu$  ( $\text{cm}^{-1}$ ): 3386 ( $\nu_{\text{OH}}$ ), 2977, 2938, 1724 ( $\nu_{\text{C=O}}$ ), 1452, 1390, 1369, 1257, 1152, 965, 845, 750.

### Determination of Critical Micelle Concentration

PNA was used as fluorescence probe to measure the *cmc* of PMBTFVB-*g*-PAA **4** amphiphilic graft copolymer. Acetone solution of PNA (2 mM) was added to a large amount of water until the concentration of PNA reached 0.002 mM. Next, different amounts of THF solution of PMBTFVB-*g*-PAA **4** graft copolymer (1, 0.1, 0.01, or 0.001 mg/mL) were added to water containing PNA ( $[\text{PNA}] = 0.002$  mM).

### Micellar Morphology

PMBTFVB-*g*-PAA **4** graft copolymer was first dissolved in THF with different concentrations. Next, deionized water was added slowly (0.36 mL/h) to 1 g of THF stock solution until the desired water content was reached. The solution was sealed

with a PTFE plug for equilibration under stirring for another 12 h. The solution was then dialyzed against deionized water with slow stirring for 5 days to remove THF, and deionized water was changed twice one day. pH of micellar solution was about 4.9-5.1. For TEM studies, a drop of micellar solution was deposited on an electron microscopy copper grid coated with carbon film and the water evaporated at room temperature.

## References and Notes

- (1) Kennedy, A. P.; Babb, D. A.; Bermmer, J. N.; Pasztor, A. J. *J. Polym. Sci. Polym. Chem.* **1995**, *33*, 1859-1865.
- (2) Liu, H.; Li, Y. J.; Zhang, S.; Yang, D.; Hu, J. H.; Huang, X. Y. *J. Polym. Sci. Polym. Chem.* **2011**, *49*, 11-22.
- (3) Liu, H.; Zhang, S.; Li, Y. J.; Yang, D.; Hu, J. H.; Huang, X. Y. *Polymer* **2010**, *51*, 5198-5206.

**Table S1.** Preparation of PMBTFVB-Br **2** Macroinitiator<sup>a</sup>

| Sample    | NBS   | Br% <sup>b</sup> | $M_{n, \text{GPC}}^c$ | $M_w/M_n^c$ | $N_{\text{ATRP}}^d$ | $D_{\text{ATRP}}^e$ |
|-----------|-------|------------------|-----------------------|-------------|---------------------|---------------------|
|           | (eq.) | (%)              | (KDa)                 |             |                     | (%)                 |
| <b>2a</b> | 0.3   | 6.71             | 5.8                   | 1.19        | 7.6                 | 26.5                |
| <b>2b</b> | 0.7   | 12.11            | 5.8                   | 1.18        | 14.5                | 51.2                |
| <b>2c</b> | 1.0   | 16.23            | 6.1                   | 1.19        | 20.4                | 72.1                |

<sup>a</sup> Reaction temperature: 80°C; reaction time: 24 h; feeding ratio: [methyl]:[BPO] = 1:0.2. <sup>b</sup> Determined by the titration with Hg(NO<sub>3</sub>)<sub>2</sub>. <sup>c</sup> Measured by GPC in THF at 35°C. <sup>d</sup> The number of benzyl bromide ATRP initiating group per chain obtained from <sup>1</sup>H NMR. <sup>e</sup> **Density** of benzyl bromide ATRP initiating group.

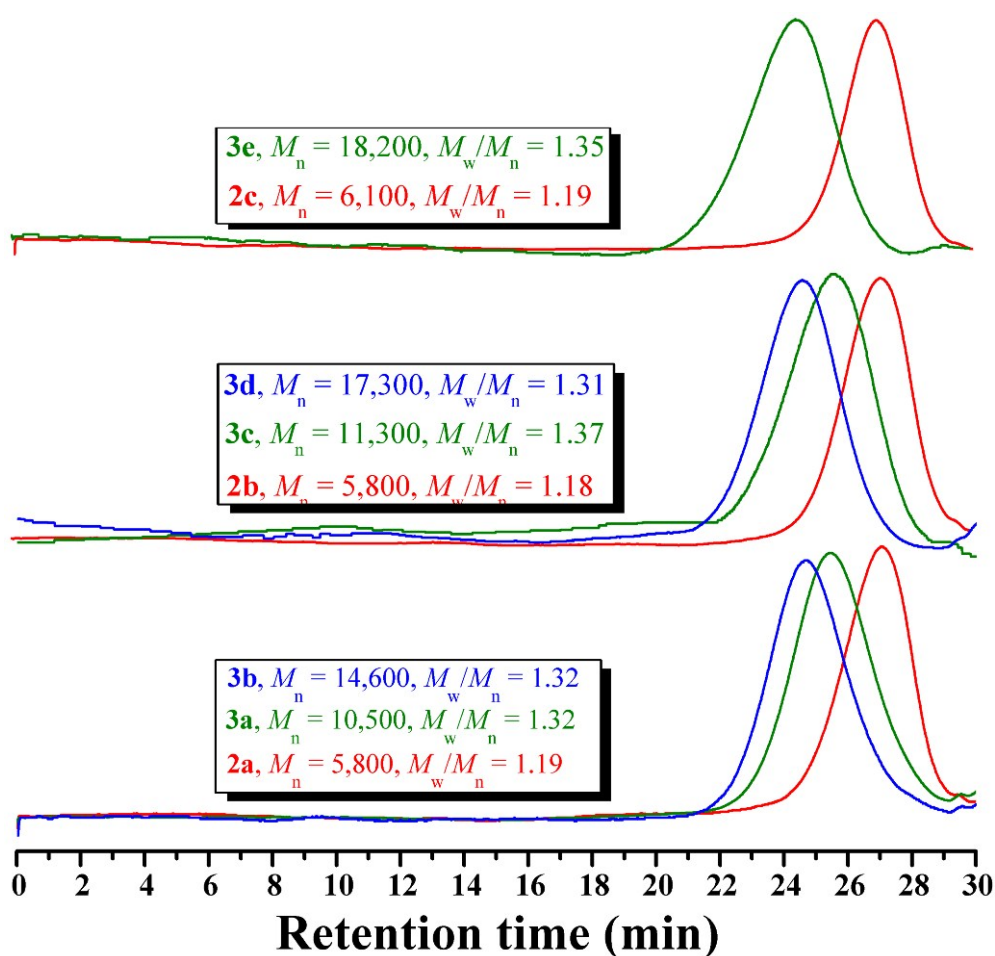**Figure S1.** GPC traces of PMBTFVB-Br **2** and PMBTFVB-g-PtBA **3** in THF.

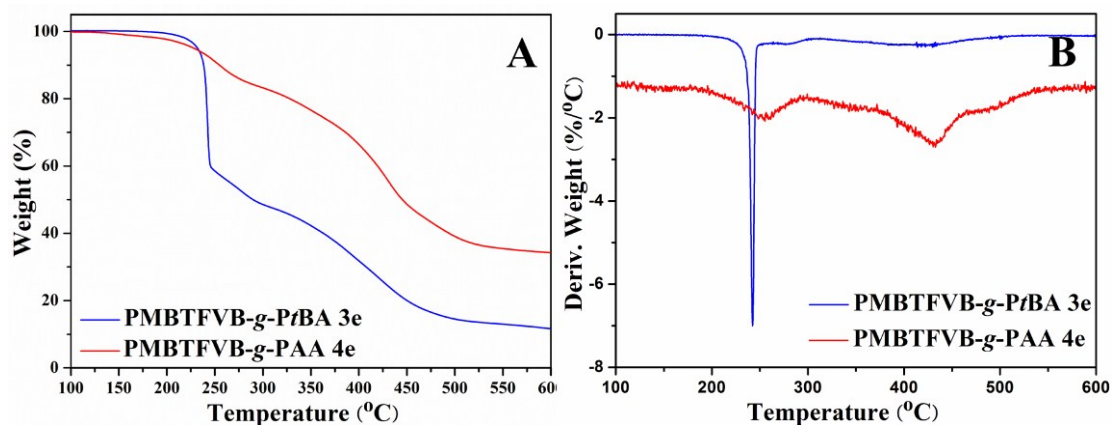

**Figure S2.** TGA (A) and DTG (B) curves (in N<sub>2</sub>) of PMBTFVB-g-PtBA **3e** and PMBTFVB-g-PAA **4e** graft copolymer with a heating rate of 10°C/min.

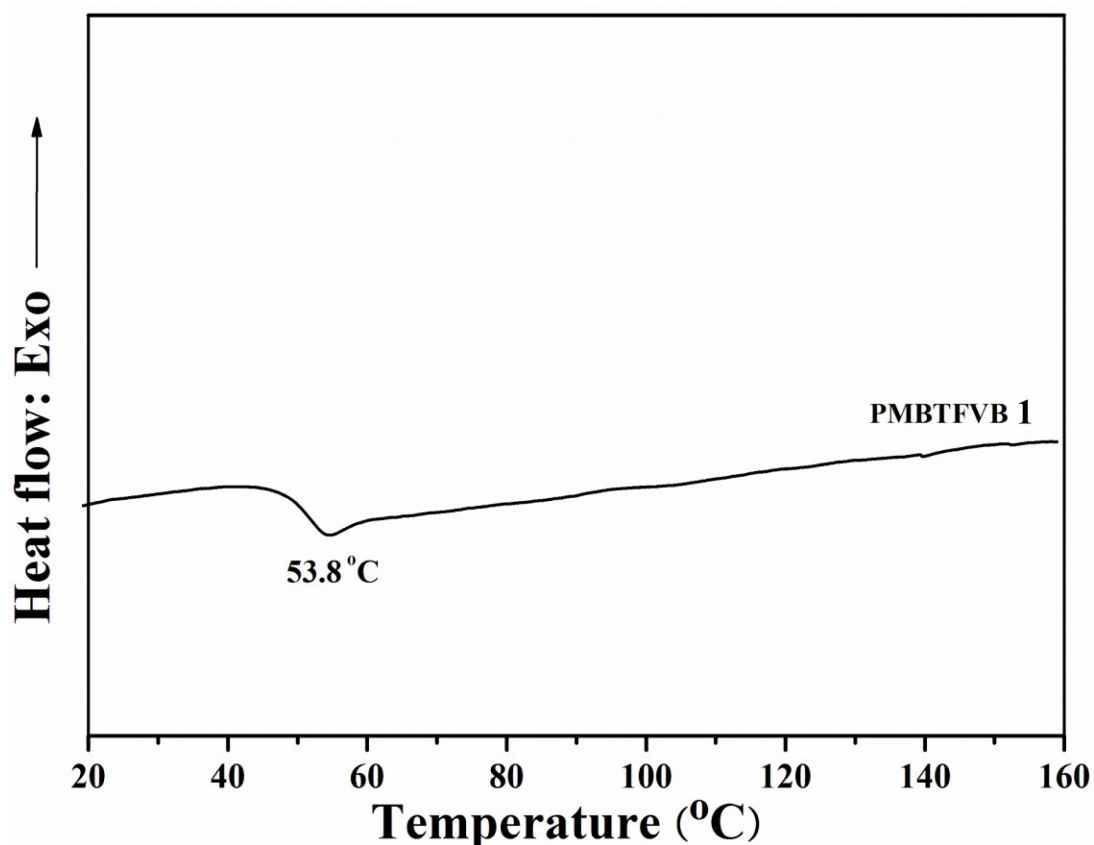

**Figure S3.** Third heating DSC scan (in N<sub>2</sub>) of PMBTFVB **1** with a heating rate of 10°C/min.
